# Supplementary material for: Children's and adolescents' sedentary behaviour in relation to socioeconomic position
Source: PubMed Central journal article supplement — J Epidemiol Community Health. 2013 Jul 13;67(10):868–74. doi: 10.1136/jech-2013-202609 (PMC3835391; doi:10.1136/jech-2013-202609), 2013-07-13
Supplement: jech-2013-202609-s1.pdf [file jech-2013-202609-s1.pdf]

## Appendix Tables

**Appendix Table 1:** Sample Characteristics by Casewise Inclusion and Exclusion of Missing Values for Accelerometry, TV, and Non-TV Sitting samples.

| <i>Categorical variables<sup>a</sup></i>                  | <b>Accelerometry-Measured Sedentary Time Models</b> |           |          |             |           |          |          | <i>% missing</i> |
|-----------------------------------------------------------|-----------------------------------------------------|-----------|----------|-------------|-----------|----------|----------|------------------|
|                                                           | Excluded                                            |           |          | Included    |           |          | <i>p</i> |                  |
|                                                           | <i>%</i>                                            | <i>N</i>  |          | <i>%</i>    | <i>N</i>  |          |          |                  |
| Sex (% male)                                              | 47.92                                               | 192       |          | 46.51       | 587       |          | 0.734    | 0.0              |
| Limiting longstanding illness (% with LLI)                | 8.9                                                 | 192       |          | 6.8         | 587       |          | 0.598    | 0.0              |
| Household income (% in highest quintile)                  | 8.5                                                 | 71        |          | 13.45       | 587       |          | 0.014    | 15.53            |
| Social class (% managerial technical or professional)     | 45.45                                               | 165       |          | 43.61       | 587       |          | 0.900    | 3.5              |
| Area deprivation (% in most affluent quintile)            | 21.35                                               | 192       |          | 23.00       | 587       |          | 0.157    | 0.0              |
| <i>Continuous variables<sup>b</sup></i>                   | <i>Mean</i>                                         | <i>SD</i> | <i>N</i> | <i>Mean</i> | <i>SD</i> | <i>N</i> | <i>p</i> | <i>% missing</i> |
| Age                                                       | 10.41                                               | 3.0       | 192      | 10.11       | 3.0       | 587      | 0.245    | 0.0              |
| BMI                                                       | 19.70                                               | 5.0       | 158      | 18.76       | 3.4       | 587      | 0.005    | 4.4              |
| Sedentary time per day (Acc) (mins)                       | 462.46                                              | 101.62    | 192      | 446.02      | 100.47    | 587      | 0.050    | 0.0              |
| TV time per day (SR) (mins)                               | 120.72                                              | 73.52     | 192      | 117.93      | 76.45     | 587      | 0.658    | 0.0              |
| Non-TV sitting time per day (SR) (mins)                   | 107.78                                              | 65.27     | 192      | 111.31      | 70.46     | 587      | 0.540    | 0.0              |
| Active transportation time to and from School (mins)      | 12.26                                               | 15.11     | 192      | 13.35       | 16.29     | 587      | 0.414    | 0.0              |
| Sporting and informal activities time per day (SR) (mins) | 75.99                                               | 94.80     | 192      | 54.69       | 53.06     | 587      | 0.000    | 0.0              |
| MVPA time per day (Acc) (mins)                            | 62.21                                               | 40.39     | 192      | 66.91       | 39.44     | 587      | 0.155    | 0.0              |
| <i>Categorical variables<sup>a</sup></i>                  | <b>TV Time models</b>                               |           |          |             |           |          |          | <i>% missing</i> |
|                                                           | Excluded                                            |           |          | Included    |           |          | <i>p</i> |                  |
|                                                           | <i>%</i>                                            | <i>N</i>  |          | <i>%</i>    | <i>N</i>  |          |          |                  |
| Sex (% male)                                              | 48.33                                               | 1765      |          | 50.05       | 3822      |          | 0.231    | 0.0              |
| Limiting longstanding illness (% with LLI)                | 9.2                                                 | 1765      |          | 7.8         | 3822      |          | 0.116    | 0.0              |
| Household income (% in highest quintile)                  | 10.82                                               | 869       |          | 15.10       | 3822      |          | 0.000    | 16.04            |

quintile)

|                                                           | Mean   | SD    | N    | Mean   | SD    | N     | <i>p</i> | % missing |
|-----------------------------------------------------------|--------|-------|------|--------|-------|-------|----------|-----------|
| Social class (% managerial technical or professional)     | 43.72  |       | 1505 | 45.05  | 3822  | 0.433 | 4.7      |           |
| Area deprivation (% in most affluent quintile)            | 20.34  |       | 1765 | 22.58  | 3822  | 0.000 | 0.0      |           |
| Age                                                       | 10.29  | 3.2   | 1765 | 10.01  | 3.1   | 3822  | 0.002    | 0.0       |
| BMI                                                       | 19.62  | 5.0   | 1137 | 18.79  | 3.46  | 3822  | 0.000    | 11.2      |
| TV time per day (SR) (mins)                               | 127.33 | 86.22 | 1765 | 113.23 | 62.8  | 3822  | 0.000    | 0.0       |
| Non-TV sitting time per day (SR) (mins)                   | 111.12 | 73.79 | 1765 | 111.09 | 70.43 | 3822  | 0.987    | 0.0       |
| Active transportation time to and from School (mins)      | 12.54  | 18.16 | 1765 | 12.07  | 15.08 | 3822  | 0.310    | 0.0       |
| Sporting and informal activities time per day (SR) (mins) | 67.17  | 84.42 | 1765 | 55.52  | 51.80 | 3822  | 0.000    | 0.0       |

#### Non-TV Sitting Time Models

| <i>Categorical variables<sup>a</sup></i>              | Excluded |       |      | Included |       |      | <i>p</i> | % missing |
|-------------------------------------------------------|----------|-------|------|----------|-------|------|----------|-----------|
|                                                       | %        | N     |      | %        | N     |      |          |           |
| Sex (% male)                                          | 49.46    | 1767  |      | 49.53    | 3820  |      | 0.963    | 0.0       |
| Limiting longstanding illness (% with LLI)            | 9.1      | 1767  |      | 7.9      | 3820  |      | 0.117    | 0.0       |
| Household income (% in highest quintile)              | 11.48    | 871   |      | 14.95    | 3820  |      | 0.000    | 16.04     |
| Social class (% managerial technical or professional) | 44.46    | 1507  |      | 44.76    | 3820  |      | 0.714    | 4.7       |
| Area deprivation (% in most affluent quintile)        | 20.66    | 1767  |      | 22.44    | 3820  |      | 0.000    | 0.0       |
|                                                       | Mean     | SD    | N    | Mean     | SD    | N    | <i>p</i> | % missing |
| Age                                                   | 10.33    | 3.2   | 1767 | 9.99     | 3.1   | 3820 | 0.000    | 0.0       |
| BMI                                                   | 19.63    | 5.0   | 1139 | 18.79    | 3.5   | 3820 | 0.000    | 11.24     |
| TV time per day (SR) (mins)                           | 119.46   | 75.63 | 1767 | 116.86   | 69.22 | 3820 | 0.206    | 0.0       |
| Non-TV sitting time per day (SR) (mins)               | 119.28   | 87.62 | 1767 | 107.32   | 62.32 | 3820 | 0.000    | 0.0       |
| Active transportation time to and from School (mins)  | 12.72    | 18.24 | 1767 | 11.98    | 15.03 | 3820 | 0.114    | 0.0       |

Sporting and  
informal activities  
time per day (SR)  
(mins)

---

|       |       |      |       |       |      |       |     |
|-------|-------|------|-------|-------|------|-------|-----|
| 67.16 | 84.36 | 1767 | 55.51 | 51.82 | 3820 | 0.000 | 0.0 |
|-------|-------|------|-------|-------|------|-------|-----|

---

a Chi Square was used to test significance of association between categorical variables and casewise exclusion

b Anova was used to test significance of association between continuous variables and casewise exclusion

**Appendix Table 2:** Characteristics of Self-Reported TV time and Accelerometer-Measured Sedentary Time Samples

|                                                              | Sample          |                           | <i>p</i>     |
|--------------------------------------------------------------|-----------------|---------------------------|--------------|
|                                                              | TV*<br>(N=3245) | Accelerometer*<br>(N=587) |              |
| <b>Categorical variables<sup>a</sup></b>                     | %               | %                         |              |
| Sex (% male)                                                 | 50.7            | 46.5                      | <i>0.062</i> |
| Limiting longstanding illness<br>(% with LLI)                | 8.0             | 6.8                       | <i>0.433</i> |
| <b>Continuous variables<sup>b</sup></b>                      | M (SD)          | M (SD)                    | <i>p</i>     |
| Age                                                          | 10.00 (3.1)     | 10.11 (3.0)               | <i>0.419</i> |
| <i>BMI</i>                                                   | 18.80 (3.5)     | 18.76 (3.4)               | <i>0.806</i> |
| TV time per day (SR) (mins)                                  | 113.29 (62.7)   | 117.93 (76.45)            | <i>0.112</i> |
| Non-TV sitting time per day<br>(SR) (mins)                   | 111.27 (70.81)  | 111.31 (70.46)            | <i>0.990</i> |
| Active transportation time to<br>and from School (mins)      | 11.83 (14.84)   | 13.35 (16.29)             | <i>0.025</i> |
| Sporting and informal activities<br>time per day (SR) (mins) | 55.65 (51.55)   | 54.69 (53.06)             | <i>0.681</i> |

\* TV sample comprises individuals who have valid TV time data, but do not have valid accelerometer ST data. Accelerometer sample comprises individuals with valid accelerometer ST data.

<sup>a</sup> Chi Square was used to test significance of association between categorical variables and TV/accelerometer sample.

<sup>b</sup> Anova was used to test significance of association between continuous variables and TV/accelerometer sample.

**Appendix Table 3: Multivariable-adjusted Associations between Socioeconomic Position (SEP) Score and Sedentary Time in Children**

| <i>SEP score</i>                                       | Model 1 <sup>a</sup> Coefficient <sup>b</sup><br>(95% CI) | Model 2 <sup>a</sup> Coefficient <sup>b</sup><br>(95% CI) | Model 3 <sup>a</sup> Coefficient <sup>b</sup><br>(95% CI) |
|--------------------------------------------------------|-----------------------------------------------------------|-----------------------------------------------------------|-----------------------------------------------------------|
| <b>Accelerometer Sedentary Time (mins/day) (N=587)</b> |                                                           |                                                           |                                                           |
| 1 (lowest)<br>(reference)                              |                                                           |                                                           |                                                           |
| 2                                                      | 5.14 (-10.58, 20.88)                                      | 6.35 (-9.24, 21.94)                                       | 7.01 (-6.51, 20.54)                                       |
| 3                                                      | 15.12 (-0.93, 31.18)                                      | 15.36 (-0.67, 31.41)                                      | 12.28 (-0.59, 25.17)                                      |
| 4                                                      | 24.14 (10.09, 38.18)                                      | 24.15 (10.27, 38.03)                                      | 13.08 (0.92, 25.24)                                       |
| 5 (highest)                                            | 29.42 (14.26, 44.59)                                      | 29.55 (14.44, 44.66)                                      | 17.08 (4.74, 29.41)                                       |
| <i>Trend p</i>                                         | <0.000                                                    | <0.000                                                    | <0.0001                                                   |
| <b>TV Time (mins/day) (N=3822)</b>                     |                                                           |                                                           |                                                           |
| 1 (lowest)<br>(reference)                              |                                                           |                                                           |                                                           |
| 2                                                      | -13.85 (-24.63, -3.07)                                    | -13.4 (-24.03, -2.76)                                     | -13.2 (-23.77, -2.62)                                     |
| 3                                                      | -2.66 (-13.5, 8.17)                                       | -0.95 (-11.62, 9.71)                                      | -2.07 (-12.62, 8.47)                                      |
| 4                                                      | -11.65 (-22.14, -1.16)                                    | -11.66 (-22.06, -1.25)                                    | -12.96 (-23.35, -2.56)                                    |
| 5 (highest)                                            | -15.53 (-25.01, -6.06)                                    | -13.64 (-23.08, -4.2)                                     | -15.74 (-25.15, -6.33)                                    |
| <i>Trend p</i>                                         | 0.005                                                     | 0.016                                                     | 0.003                                                     |
| <b>Non-TV Sitting Time (mins/day) (N=3820)</b>         |                                                           |                                                           |                                                           |
| 1 (lowest)<br>(reference)                              |                                                           |                                                           |                                                           |
| 2                                                      | -3.4 (-12.39, 5.58)                                       | -3.33 (-12.34, 5.67)                                      | -3.08 (-12.04, 5.87)                                      |
| 3                                                      | -0.35 (-10.1, 9.39)                                       | -0.17 (-10.02, 9.67)                                      | -1.37 (-11.13, 8.39)                                      |
| 4                                                      | 11.2 (1.76, 20.64)                                        | 11.01 (1.47, 20.55)                                       | 9.48 (-0.13, 19.1)                                        |
| 5 (highest)                                            | 9.44 (0.77, 18.11)                                        | 9.6 (0.77, 18.43)                                         | 7.11 (-1.77, 15.99)                                       |
| <i>Trend p</i>                                         | 0.001                                                     | 0.001                                                     | 0.010                                                     |

<sup>a</sup> Model 1: adjusted for age and sex; model 2: further adjustments for BMI and limiting long term illness; model 3: further adjustments for time spent in active transportation to and from school, time spent in sporting or informal activities, and MVPA time (accelerometer models only). Models with accelerometer sedentary time as the outcome were also adjusted for average accelerometer wear time on valid days.

<sup>b</sup> Generalised linear model coefficients; coefficients indicate mean differences (in daily sedentary time) between the reference category (SEP 1) and each of the other SEP scores, e.g. a value of 5 indicates that a specific category had an average daily sedentary time that is 5 minutes higher than the referent group.

**Appendix Table 4:** Multivariable-adjusted associations between socioeconomic position (SEP) score and sedentary time in children, on week and weekend days

| <b>Weekdays</b>                                    |                                                           |                                                           |                                                           |
|----------------------------------------------------|-----------------------------------------------------------|-----------------------------------------------------------|-----------------------------------------------------------|
| <i>SEP score</i>                                   | Model 1 <sup>a</sup> Coefficient <sup>b</sup><br>(95% CI) | Model 2 <sup>a</sup> Coefficient <sup>b</sup><br>(95% CI) | Model 3 <sup>a</sup> Coefficient <sup>b</sup><br>(95% CI) |
| <b>Accelerometry Sedentary Time (mins) (N=582)</b> |                                                           |                                                           |                                                           |
| 1 (lowest) (reference)                             |                                                           |                                                           |                                                           |
| 2                                                  | 7.99 (-8.51, 24.49)                                       | 9.67 (-6.65, 25.99)                                       | 8.12 (-5.99, 22.24)                                       |
| 3                                                  | 16.79 (0.41, 33.16)                                       | 17.24 (0.85, 33.64)                                       | 13.15 (0.24, 26.07)                                       |
| 4                                                  | 29.37 (14.45, 44.29)                                      | 29.52 (14.79, 44.26)                                      | 15.22 (2.62, 27.83)                                       |
| 5 (highest)                                        | 31.58 (15.51, 47.65)                                      | 31.73 (15.7, 47.76)                                       | 17.89 (4.9, 30.88)                                        |
| <i>Trend p</i>                                     | 0.000                                                     | 0.000                                                     | 0.002                                                     |
| <b>TV Time (mins) (N=3818)</b>                     |                                                           |                                                           |                                                           |
| 1 (lowest) (reference)                             |                                                           |                                                           |                                                           |
| 2                                                  | -15.49 (-26.34, -4.63)                                    | -14.8 (-25.51, -4.1)                                      | -14.83 (-25.5, -4.17)                                     |
| 3                                                  | -5.45 (-16.4, 5.5)                                        | -3.46 (-14.23, 7.3)                                       | -4.28 (-14.94, 6.37)                                      |
| 4                                                  | -16.27 (-27.13, -5.41)                                    | -15.8 (-26.59, -5.02)                                     | -16.76 (-27.53, -5.99)                                    |
| 5 (highest)                                        | -17.91 (-27.56, -8.27)                                    | -15.59 (-25.18, -6)                                       | -17.19 (-26.8, -7.58)                                     |
| <i>Trend p</i>                                     | 0.001                                                     | 0.003                                                     | 0.001                                                     |
| <b>Non-TV Sitting Time (mins) (N=3816)</b>         |                                                           |                                                           |                                                           |
| 1 (lowest) (reference)                             |                                                           |                                                           |                                                           |
| 2                                                  | -5.21 (-14.55, 4.12)                                      | -4.99 (-14.32, 4.32)                                      | -4.86 (-14.14, 4.41)                                      |
| 3                                                  | -1.95 (-12.07, 8.17)                                      | -1.27 (-11.49, 8.94)                                      | -2.3 (-12.45, 7.84)                                       |
| 4                                                  | 9.18 (-0.66, 19.04)                                       | 9.13 (-0.82, 19.1)                                        | 7.73 (-2.3, 17.77)                                        |
| 5 (highest)                                        | 7.18 (-1.97, 16.35)                                       | 8.02 (-1.27, 17.33)                                       | 5.73 (-3.64, 15.11)                                       |
| <i>Trend p</i>                                     | 0.006                                                     | 0.004                                                     | 0.025                                                     |
| <b>Weekend days</b>                                |                                                           |                                                           |                                                           |
| <i>SEP score</i>                                   | Model 1 <sup>a</sup> Coefficient <sup>b</sup><br>(95% CI) | Model 2 <sup>a</sup> Coefficient <sup>b</sup><br>(95% CI) | Model 3 <sup>a</sup> Coefficient <sup>b</sup><br>(95% CI) |
| <b>Accelerometry Sedentary Time (mins) (N=455)</b> |                                                           |                                                           |                                                           |
| 1 (lowest) (reference)                             |                                                           |                                                           |                                                           |
| 2                                                  | -7.36 (-29.32, 14.59)                                     | -7.38 (-29.4, 14.62)                                      | 7.36 (-11.06, 25.79)                                      |
| 3                                                  | 10.95 (-12.07, 33.98)                                     | 11.61 (-11.39, 34.62)                                     | 9.87 (-9.14, 28.9)                                        |
| 4                                                  | 2.13 (-18.97, 23.25)                                      | 2.79 (-18.09, 23.67)                                      | 0.48 (-16.7, 17.67)                                       |
| 5 (highest)                                        | 11.31 (-10.23, 32.87)                                     | 12.62 (-8.68, 33.94)                                      | 16.52 (-1.12, 34.16)                                      |
| <i>Trend p</i>                                     | 0.178                                                     | 0.168                                                     | 0.197                                                     |
| <b>TV Time (mins) (N=3874)</b>                     |                                                           |                                                           |                                                           |
| 1 (lowest) (reference)                             |                                                           |                                                           |                                                           |
| 2                                                  | -4.85 (-19.37, 9.66)                                      | -4.56 (-18.98, 9.85)                                      | -3.77 (-17.72, 10.17)                                     |
| 3                                                  | -0.9 (-15.35, 13.55)                                      | 0 (-14.46, 14.45)                                         | -1.64 (-15.79, 12.49)                                     |
| 4                                                  | -4.28 (-17.75, 9.17)                                      | -4.98 (-18.4, 8.42)                                       | -6.26 (-19.48, 6.96)                                      |
| 5 (highest)                                        | -11.42 (-24.06, 1.21)                                     | -10.3 (-23.11, 2.5)                                       | -13.58 (-26.08, -1.08)                                    |
| <i>Trend p</i>                                     | 0.114                                                     | 0.129                                                     | 0.032                                                     |
| <b>Non-TV Sitting Time (mins) (N=3841)</b>         |                                                           |                                                           |                                                           |
| 1 (lowest) (reference)                             |                                                           |                                                           |                                                           |
| 2                                                  | -2.01 (-13.69, 9.67)                                      | -2.13 (-13.85, 9.57)                                      | -1.74 (-13.5, 10.01)                                      |
| 3                                                  | -0.16 (-12.51, 12.19)                                     | -0.74 (-13.12, 11.63)                                     | -1.39 (-13.74, 10.95)                                     |

|                |                     |                     |                     |
|----------------|---------------------|---------------------|---------------------|
| 4              | 14.56 (2.23, 26.89) | 14.04 (1.67, 26.4)  | 13.5 (1.12, 25.87)  |
| 5 (highest)    | 20.16 (8.37, 31.96) | 19.37 (7.51, 31.23) | 18.03 (6.18, 29.88) |
| <i>Trend p</i> | <i>0.000</i>        | <i>0.000</i>        | <i>0.000</i>        |

<sup>a</sup> Model 1: adjusted for age and sex; model 2: further adjustments for BMI and limiting longstanding illness; model 3: further adjustments for time spent in active transportation to and from school (weekday models only), time spent in sporting or informal activities (on week or weekend days), and MVPA time (accelerometer models only, on week or weekend days). Models with accelerometry sedentary time as the outcome were also adjusted for average accelerometer wear time on valid days (week and weekend days).

<sup>b</sup> Generalised linear model coefficients; coefficients indicate mean differences (in daily sedentary time) between the reference category (SEP 1) and each of the other SEP scores, e.g. a value of 5 indicates that a specific category had an average daily sedentary time that is 5 minutes higher than the referent group.

**Appendix Table 5:** Multivariable-adjusted associations between area deprivation and sedentary time in children, on week and weekend days

| <b>Weekdays</b>                                    |                                                           |                                                           |                                                           |
|----------------------------------------------------|-----------------------------------------------------------|-----------------------------------------------------------|-----------------------------------------------------------|
| <i>Index of Multiple Deprivation Quintiles</i>     | Model 1 <sup>a</sup> Coefficient <sup>b</sup><br>(95% CI) | Model 2 <sup>a</sup> Coefficient <sup>b</sup><br>(95% CI) | Model 3 <sup>a</sup> Coefficient <sup>b</sup><br>(95% CI) |
| <b>Accelerometry Sedentary Time (mins) (N=582)</b> |                                                           |                                                           |                                                           |
| Q1 (least deprived)<br>(reference)                 |                                                           |                                                           |                                                           |
| Q2                                                 | 9.99 (-6.6, 26.59)                                        | 8.71 (-7.45, 24.88)                                       | 0.97 (-13.36, 15.31)                                      |
| Q3                                                 | 7.44 (-8.28, 23.16)                                       | 3.34 (-12.48, 19.16)                                      | 2.09 (-11.45, 15.64)                                      |
| Q4                                                 | 21.67 (5.75, 37.58)                                       | 17.25 (1.15, 33.34)                                       | 8.54 (-5.66, 22.74)                                       |
| Q5 (most deprived)                                 | 28.25 (14.2, 42.3)                                        | 22.01 (7.57, 36.44)                                       | 9.62 (-3.55, 22.8)                                        |
| <i>Trend p</i>                                     | 0.000                                                     | 0.007                                                     | 0.127                                                     |
| <b>TV Time (mins) (N=3818)</b>                     |                                                           |                                                           |                                                           |
| Q1 (least deprived)<br>(reference)                 |                                                           |                                                           |                                                           |
| Q2                                                 | -5.37 (-15.88, 5.13)                                      | -4.3 (-14.77, 6.15)                                       | -4.55 (-14.9, 5.79)                                       |
| Q3                                                 | -7.26 (-17.51, 2.99)                                      | -2.04 (-12.38, 8.3)                                       | -2.54 (-12.86, 7.77)                                      |
| Q4                                                 | -5.64 (-15.71, 4.42)                                      | 2.74 (-7.84, 13.34)                                       | 2.17 (-8.34, 12.69)                                       |
| Q5 (most deprived)                                 | -5.82 (-15.8, 4.16)                                       | 2.98 (-7.76, 13.74)                                       | 3.23 (-7.43, 13.91)                                       |
| <i>Trend p</i>                                     | 0.285                                                     | 0.300                                                     | 0.289                                                     |
| <b>Non-TV Sitting Time (mins) (N=3816)</b>         |                                                           |                                                           |                                                           |
| Q1 (least deprived)<br>(reference)                 |                                                           |                                                           |                                                           |
| Q2                                                 | -4.82 (-14.19, 4.54)                                      | -6.92 (-16.48, 2.63)                                      | -7.03 (-16.56, 2.5)                                       |
| Q3                                                 | -0.65 (-10.03, 8.73)                                      | -3.28 (-12.75, 6.18)                                      | -3.67 (-13.1, 5.76)                                       |
| Q4                                                 | 7.84 (-1.65, 17.34)                                       | 4.99 (-4.9, 14.9)                                         | 4.5 (-5.33, 14.34)                                        |
| Q5 (most deprived)                                 | 4.34 (-4.98, 13.67)                                       | 1.69 (-8.08, 11.47)                                       | 2.14 (-7.66, 11.95)                                       |
| <i>Trend p</i>                                     | 0.048                                                     | 0.319                                                     | 0.294                                                     |
| <b>Weekend days</b>                                |                                                           |                                                           |                                                           |
| <i>Index of Multiple Deprivation Quintiles</i>     | Model 1 <sup>a</sup> Coefficient <sup>b</sup><br>(95% CI) | Model 2 <sup>a</sup> Coefficient <sup>b</sup><br>(95% CI) | Model 3 <sup>a</sup> Coefficient <sup>b</sup><br>(95% CI) |
| <b>Accelerometry Sedentary Time (mins) (N=455)</b> |                                                           |                                                           |                                                           |
| Q1 (least deprived)<br>(reference)                 |                                                           |                                                           |                                                           |
| Q2                                                 | -6.71 (-26.31, 12.89)                                     | -8.83 (-28.08, 10.4)                                      | 0.11 (-15.54, 15.77)                                      |
| Q3                                                 | -7.22 (-28.89, 14.45)                                     | -10.41 (-32.29, 11.45)                                    | -1.5 (-19.25, 16.24)                                      |
| Q4                                                 | 0.25 (-21.46, 21.98)                                      | -2.86 (-23.85, 18.12)                                     | 8.88 (-8.8, 26.57)                                        |
| Q5 (most deprived)                                 | -2.36 (-24.01, 19.27)                                     | -12.31 (-35.24, 10.61)                                    | -4.68 (-23.98, 14.62)                                     |
| <i>Trend p</i>                                     | 0.470                                                     | 0.495                                                     | 0.820                                                     |
| <b>TV Time (mins) (N=3874)</b>                     |                                                           |                                                           |                                                           |
| Q1 (least deprived)<br>(reference)                 |                                                           |                                                           |                                                           |
| Q2                                                 | 4.19 (-10.08, 18.48)                                      | 3.95 (-10.22, 18.14)                                      | 5.33 (-8.44, 19.11)                                       |
| Q3                                                 | -2.9 (-15.58, 9.77)                                       | 0.64 (-12.39, 13.69)                                      | 2.58 (-10.39, 15.55)                                      |
| Q4                                                 | -1.9 (-14.6, 10.8)                                        | 4.57 (-9.01, 18.16)                                       | 5.98 (-7.43, 19.4)                                        |
| Q5 (most deprived)                                 | 2.89 (-10.21, 16)                                         | 10.28 (-3.66, 24.22)                                      | 9.91 (-3.91, 23.74)                                       |
| <i>Trend p</i>                                     | 0.994                                                     | 0.175                                                     | 0.190                                                     |
| <b>Non-TV Sitting Time (mins) (N=3841)</b>         |                                                           |                                                           |                                                           |



|                                    |                      |                       |                       |
|------------------------------------|----------------------|-----------------------|-----------------------|
| Q1 (least deprived)<br>(reference) |                      |                       |                       |
| Q2                                 | -9.16 (-20.31, 1.98) | -11.14 (-22.28, 0)    | -10.51 (-21.68, 0.65) |
| Q3                                 | 2.43 (-9.51, 14.39)  | -1.17 (-13.02, 10.67) | -0.35 (-12.21, 11.5)  |
| Q4                                 | 14.67 (1.93, 27.4)   | 8.04 (-4.85, 20.94)   | 8.55 (-4.28, 21.38)   |
| Q5 (most deprived)                 | 12.56 (1.35, 23.76)  | 5.15 (-6.43, 16.73)   | 4.99 (-6.6, 16.59)    |
| <i>Trend p</i>                     | <i>0.000</i>         | <i>0.065</i>          | <i>0.071</i>          |

<sup>a</sup> Model 1: adjusted for age and sex; model 2: further adjustments for BMI, limiting longstanding illness, household income, and social class; model 3: further adjustments for time spent in active transportation to and from school (weekday models only), time spent in sporting or informal activities (on week or weekend days), and MVPA time (accelerometer models only, on week or weekend days). Models with accelerometer sedentary time as the outcome were also adjusted for average accelerometer wear time on valid days (week and weekend days).

<sup>b</sup> Generalised linear model coefficients; coefficients indicate mean differences (in daily sedentary time) between the reference category (quintile 1) and each of the other deprivation quintiles, e.g. a value of 5 indicates that a specific category had an average daily sedentary time that is 5 minutes higher than the referent group.

**Appendix Table 6:** Multivariable-adjusted associations between equivalised household income and sedentary time in children, on week and weekend days

| <b>Weekdays</b>                                    |                                                           |                                                           |                                                           |
|----------------------------------------------------|-----------------------------------------------------------|-----------------------------------------------------------|-----------------------------------------------------------|
| <i>Household Income Quintiles</i>                  | Model 1 <sup>a</sup> Coefficient <sup>b</sup><br>(95% CI) | Model 2 <sup>a</sup> Coefficient <sup>b</sup><br>(95% CI) | Model 3 <sup>a</sup> Coefficient <sup>b</sup><br>(95% CI) |
| <b>Accelerometry Sedentary Time (mins) (N=582)</b> |                                                           |                                                           |                                                           |
| <£10671 (reference)                                |                                                           |                                                           |                                                           |
| £10671-£17788                                      | -11.91 (-28.04, 4.21)                                     | -12.8 (-28.93, 3.31)                                      | -9.16 (-22.37, 4.05)                                      |
| £17789-£27316                                      | 3.1 (-11.24, 17.45)                                       | -1.15 (-16.19, 13.88)                                     | -5.89 (-19.61, 7.82)                                      |
| £27317-£44199                                      | 14.39 (-1.13, 29.92)                                      | 3.97 (-13.55, 21.51)                                      | 2.78 (-12.2, 17.76)                                       |
| >£44199                                            | 13.86 (-3.82, 31.54)                                      | -4.2 (-22.85, 14.44)                                      | -3.45 (-18.94, 12.03)                                     |
| <i>Trend p</i>                                     | <i>0.002</i>                                              | <i>0.813</i>                                              | <i>0.926</i>                                              |
| <b>TV Time (mins) (N=3818)</b>                     |                                                           |                                                           |                                                           |
| <£10671 (reference)                                |                                                           |                                                           |                                                           |
| £10671-£17788                                      | -11.39 (-21.85, -0.92)                                    | -9.16 (-19.64, 1.31)                                      | -9.2 (-19.62, 1.21)                                       |
| £17789-£27316                                      | -13.73 (-23.97, -3.49)                                    | -9.49 (-20.49, 1.51)                                      | -10.33 (-21.26, 0.6)                                      |
| £27317-£44199                                      | -13.88 (-24.23, -3.53)                                    | -5.99 (-17.92, 5.93)                                      | -7.26 (-19.11, 4.57)                                      |
| >£44199                                            | -21.27 (-31.58, -10.96)                                   | -12.27 (-24.57, 0.01)                                     | -14.24 (-26.65, -1.84)                                    |
| <i>Trend p</i>                                     | <i>0.000</i>                                              | <i>0.118</i>                                              | <i>0.054</i>                                              |
| <b>Non-TV Sitting Time (mins) (N=3816)</b>         |                                                           |                                                           |                                                           |
| <£10671 (reference)                                |                                                           |                                                           |                                                           |
| £10671-£17788                                      | 5.9 (-3.19, 14.99)                                        | 6.43 (-2.57, 15.43)                                       | 6.11 (-2.82, 15.05)                                       |
| £17789-£27316                                      | 11.61 (2.06, 21.16)                                       | 11.03 (0.8, 21.25)                                        | 9.54 (-0.62, 19.71)                                       |
| £27317-£44199                                      | 7.57 (-1.46, 16.62)                                       | 5.71 (-4.21, 15.64)                                       | 3.69 (-6.17, 13.57)                                       |
| >£44199                                            | 8.96 (-0.62, 18.55)                                       | 7.28 (-3.69, 18.26)                                       | 4.28 (-6.77, 15.35)                                       |
| <i>Trend p</i>                                     | <i>0.075</i>                                              | <i>0.696</i>                                              | <i>0.861</i>                                              |
| <b>Weekend days</b>                                |                                                           |                                                           |                                                           |
| <i>Household Income Quintiles</i>                  | Model 1 <sup>a</sup> Coefficient <sup>b</sup><br>(95% CI) | Model 2 <sup>a</sup> Coefficient <sup>b</sup><br>(95% CI) | Model 3 <sup>a</sup> Coefficient <sup>b</sup><br>(95% CI) |
| <b>Accelerometry Sedentary Time (mins) (N=455)</b> |                                                           |                                                           |                                                           |
| <£10671 (reference)                                |                                                           |                                                           |                                                           |
| £10671-£17788                                      | -28.36 (-52.39, -4.34)                                    | -24.61 (-48.4, -0.81)                                     | -16.44 (-34.74, 1.86)                                     |
| £17789-£27316                                      | -16.18 (-40.16, 7.78)                                     | -6.72 (-31.81, 18.37)                                     | -9.51 (-30.49, 11.46)                                     |
| £27317-£44199                                      | 6.1 (-16.24, 28.46)                                       | 16.04 (-9.15, 41.24)                                      | 15.5 (-5.41, 36.43)                                       |
| >£44199                                            | 0.11 (-24.71, 24.95)                                      | 10.83 (-16.65, 38.31)                                     | 5.14 (-18.26, 28.56)                                      |
| <i>Trend p</i>                                     | <i>0.087</i>                                              | <i>0.107</i>                                              | <i>0.181</i>                                              |
| <b>TV Time (mins) (N=3874)</b>                     |                                                           |                                                           |                                                           |
| <£10671 (reference)                                |                                                           |                                                           |                                                           |
| £10671-£17788                                      | -7.33 (-20.73, 6.05)                                      | -6.25 (-19.79, 7.27)                                      | -5.73 (-18.81, 7.35)                                      |
| £17789-£27316                                      | -8.93 (-22.1, 4.23)                                       | -7.47 (-21.69, 6.74)                                      | -9.57 (-23.52, 4.38)                                      |
| £27317-£44199                                      | -5.14 (-18.03, 7.74)                                      | 0.51 (-14.07, 15.09)                                      | -1.84 (-16.11, 12.41)                                     |
| >£44199                                            | -23.1 (-36.02, -10.19)                                    | -15.75 (-31.15, -0.35)                                    | -17.86 (-33.13, -2.59)                                    |
| <i>Trend p</i>                                     | <i>0.017</i>                                              | <i>0.114</i>                                              | <i>0.039</i>                                              |
| <b>Non-TV Sitting Time (mins) (N=3841)</b>         |                                                           |                                                           |                                                           |
| <£10671 (reference)                                |                                                           |                                                           |                                                           |
| £10671-£17788                                      | 12.69 (1.45, 23.92)                                       | 13.33 (2.06, 24.61)                                       | 13.53 (2.28, 24.79)                                       |
| £17789-£27316                                      | 9.18 (-2.63, 21.01)                                       | 9.97 (-2.31, 22.26)                                       | 9.19 (-3.12, 21.51)                                       |
| £27317-£44199                                      | 27.25 (14.61, 39.89)                                      | 26.42 (13.05, 39.79)                                      | 25.53 (12.13, 38.93)                                      |

|                |                      |                     |                      |
|----------------|----------------------|---------------------|----------------------|
| >£44199        | 26.28 (13.84, 38.72) | 26.12 (11.9, 40.34) | 25.25 (10.88, 39.62) |
| <i>Trend p</i> | <i>0.000</i>         | <i>0.001</i>        | <i>0.001</i>         |

---

<sup>a</sup> Model 1: adjusted for age and sex; model 2: further adjustments for BMI, limiting longstanding illness, social class, and area deprivation ; model 3: further adjustments for time spent in active transportation to and from school (weekday models only), time spent in sporting or informal activities (on week or weekend days), and MVPA time (on week or weekend days). Models with accelerometry sedentary time as the outcome were also adjusted for average accelerometer wear time on valid days (week and weekend days).

<sup>b</sup> Generalised linear model coefficients; coefficients indicate mean differences (in daily sedentary time) between the reference category (>£39,000) and each of the other household income quartiles, e.g. a value of 5 indicates that a specific category had an average daily sedentary time that is 5 minutes higher than the referent group.

**Appendix Table 7:** Multivariable-adjusted associations between social class and sedentary time in children, on week and weekend days

| <b>Weekdays</b>                                    |                                                              |                                                              |                                                              |
|----------------------------------------------------|--------------------------------------------------------------|--------------------------------------------------------------|--------------------------------------------------------------|
| <i>Social Class of Head of Household</i>           | Model 1 <sup>a</sup><br>Coefficient <sup>b</sup><br>(95% CI) | Model 2 <sup>a</sup><br>Coefficient <sup>b</sup><br>(95% CI) | Model 3 <sup>a</sup><br>Coefficient <sup>b</sup><br>(95% CI) |
| <b>Accelerometry Sedentary Time (mins) (N=582)</b> |                                                              |                                                              |                                                              |
| Unskilled and semi-skilled manual (reference)      |                                                              |                                                              |                                                              |
| Skilled manual                                     | -10.53 (-25.13, 4.07)                                        | -11.56 (-26.68, 3.55)                                        | -8.72 (-21.01, 3.56)                                         |
| Skilled non-manual                                 | 11.18 (-7.24, 29.61)                                         | 8.01 (-10.77, 26.8)                                          | 2.77 (-11.69, 17.23)                                         |
| Managerial technical and professional              | 18.73 (6.38, 31.09)                                          | 9.85 (-3.52, 23.24)                                          | 3.64 (-8.46, 15.74)                                          |
| <i>Trend p</i>                                     | 0.000                                                        | 0.009                                                        | 0.082                                                        |
| <b>TV Time (mins) (N=3818)</b>                     |                                                              |                                                              |                                                              |
| Unskilled and semi-skilled manual (reference)      |                                                              |                                                              |                                                              |
| Skilled manual                                     | -6.44 (-17, 4.11)                                            | -5.3 (-16.17, 5.56)                                          | -5.17 (-15.96, 5.62)                                         |
| Skilled non-manual                                 | -10.16 (-20.71, 0.37)                                        | -9.04 (-19.7, 1.62)                                          | -8.46 (-19.08, 2.15)                                         |
| Managerial technical and professional              | -18.2 (-26.65, -9.75)                                        | -16.03 (-25.96, -6.1)                                        | -16.26 (-26.12, -6.41)                                       |
| <i>Trend p</i>                                     | 0.000                                                        | 0.001                                                        | 0.001                                                        |
| <b>Non-TV Sitting Time (mins) (N=3816)</b>         |                                                              |                                                              |                                                              |
| Unskilled and semi-skilled manual (reference)      |                                                              |                                                              |                                                              |
| Skilled manual                                     | -1.73 (-10.57, 7.09)                                         | -3.77 (-13.14, 5.6)                                          | -3.38 (-12.72, 5.94)                                         |
| Skilled non-manual                                 | 16.28 (6.09, 26.47)                                          | 15.18 (4.9, 25.46)                                           | 15.8 (5.58, 26.03)                                           |
| Managerial technical and professional              | 7.72 (-0.18, 15.63)                                          | 3.35 (-5.9, 12.61)                                           | 3.09 (-6.05, 12.25)                                          |
| <i>Trend p</i>                                     | 0.009                                                        | 0.072                                                        | 0.085                                                        |
| <b>Weekend days</b>                                |                                                              |                                                              |                                                              |
| <i>Social Class of Head of Household</i>           | Model 1 <sup>a</sup><br>Coefficient <sup>b</sup><br>(95% CI) | Model 2 <sup>a</sup><br>Coefficient <sup>b</sup><br>(95% CI) | Model 3 <sup>a</sup><br>Coefficient <sup>b</sup><br>(95% CI) |
| <b>Accelerometry Sedentary Time (mins) (N=455)</b> |                                                              |                                                              |                                                              |
| Unskilled and semi-skilled manual (reference)      |                                                              |                                                              |                                                              |
| Skilled manual                                     | -30.3 (-51.54, -9.06)                                        | -29.28 (-49.84, -8.73)                                       | -22.61 (-39.93, -5.29)                                       |
| Skilled non-manual                                 | -2.18 (-27.69, 23.32)                                        | -3.94 (-29.03, 21.14)                                        | -4.36 (-22.71, 13.97)                                        |
| Managerial technical and professional              | -3.33 (-21.27, 14.6)                                         | -13.45 (-33.04, 6.13)                                        | -11.17 (-27.61, 5.27)                                        |
| <i>Trend p</i>                                     | 0.275                                                        | 0.778                                                        | 0.795                                                        |
| <b>TV Time (mins) (N=3874)</b>                     |                                                              |                                                              |                                                              |
| Unskilled and semi-skilled manual (reference)      |                                                              |                                                              |                                                              |

|                                       |                      |                       |                      |
|---------------------------------------|----------------------|-----------------------|----------------------|
| Skilled manual                        | 4.06 (-9.51, 17.63)  | 3.2 (-10.54, 16.95)   | 2.43 (-11.05, 15.93) |
| Skilled non-manual                    | 8.76 (-5.37, 22.9)   | 7.96 (-6.12, 22.05)   | 9.31 (-4.44, 23.07)  |
| Managerial technical and professional | -10.76 (-21.9, 0.38) | -10.64 (-23.36, 2.07) | -11.62 (-24.2, 0.94) |
| <i>Trend p</i>                        | <i>0.016</i>         | <i>0.084</i>          | <i>0.065</i>         |

**Non-TV Sitting Time (mins) (N=3841)**

|                                               |                      |                      |                       |
|-----------------------------------------------|----------------------|----------------------|-----------------------|
| Unskilled and semi-skilled manual (reference) |                      |                      |                       |
| Skilled manual                                | -6.24 (-18.19, 5.69) | -11.24 (-23.7, 1.21) | -11.62 (-24.09, 0.83) |
| Skilled non-manual                            | 0.6 (-11.67, 12.89)  | -3.13 (-15.7, 9.44)  | -2.52 (-15.2, 10.16)  |
| Managerial technical and professional         | 6.01 (-4.54, 16.57)  | -10.21 (-22.3, 1.88) | -10.64 (-22.82, 1.53) |
| <i>Trend p</i>                                | <i>0.067</i>         | <i>0.386</i>         | <i>0.364</i>          |

<sup>a</sup> Model 1: adjusted for age and sex; model 2: further adjustments for BMI, limiting longstanding illness, household income, and area deprivation ; model 3: further adjustments for time spent in active transportation to and from school (weekday models only), time spent in sporting or informal activities (on week or weekend days), and MVPA time (accelerometer models only, on week or weekend days). Models with accelerometry sedentary time as the outcome were also adjusted for average accelerometer wear time on valid days (week and weekend days).

<sup>b</sup> Generalised linear model coefficients; coefficients indicate mean differences (in social class) between the reference category (non-manual) and manual, e.g. a value of 5 indicates that the manual category had an average daily sedentary time that is 5 minutes higher than the referent group.

**Appendix Table 8:** Multivariable-adjusted associations between area deprivation and sedentary time in children, on week and weekend days

| <b>Weekdays</b>                                    |                                                           |                                                           |                                                           |
|----------------------------------------------------|-----------------------------------------------------------|-----------------------------------------------------------|-----------------------------------------------------------|
| <i>Index of Multiple Deprivation Quintiles</i>     | Model 1 <sup>a</sup> Coefficient <sup>b</sup><br>(95% CI) | Model 2 <sup>a</sup> Coefficient <sup>b</sup><br>(95% CI) | Model 3 <sup>a</sup> Coefficient <sup>b</sup><br>(95% CI) |
| <b>Accelerometry Sedentary Time (mins) (N=582)</b> |                                                           |                                                           |                                                           |
| Q1 (least deprived)<br>(reference)                 |                                                           |                                                           |                                                           |
| Q2                                                 | 9.99 (-6.6, 26.59)                                        | 8.71 (-7.45, 24.88)                                       | 0.97 (-13.36, 15.31)                                      |
| Q3                                                 | 7.44 (-8.28, 23.16)                                       | 3.34 (-12.48, 19.16)                                      | 2.09 (-11.45, 15.64)                                      |
| Q4                                                 | 21.67 (5.75, 37.58)                                       | 17.25 (1.15, 33.34)                                       | 8.54 (-5.66, 22.74)                                       |
| Q5 (most deprived)                                 | 28.25 (14.2, 42.3)                                        | 22.01 (7.57, 36.44)                                       | 9.62 (-3.55, 22.8)                                        |
| <i>Trend p</i>                                     | 0.000                                                     | 0.007                                                     | 0.127                                                     |
| <b>TV Time (mins) (N=3818)</b>                     |                                                           |                                                           |                                                           |
| Q1 (least deprived)<br>(reference)                 |                                                           |                                                           |                                                           |
| Q2                                                 | -5.37 (-15.88, 5.13)                                      | -4.3 (-14.77, 6.15)                                       | -4.55 (-14.9, 5.79)                                       |
| Q3                                                 | -7.26 (-17.51, 2.99)                                      | -2.04 (-12.38, 8.3)                                       | -2.54 (-12.86, 7.77)                                      |
| Q4                                                 | -5.64 (-15.71, 4.42)                                      | 2.74 (-7.84, 13.34)                                       | 2.17 (-8.34, 12.69)                                       |
| Q5 (most deprived)                                 | -5.82 (-15.8, 4.16)                                       | 2.98 (-7.76, 13.74)                                       | 3.23 (-7.43, 13.91)                                       |
| <i>Trend p</i>                                     | 0.285                                                     | 0.300                                                     | 0.289                                                     |
| <b>Non-TV Sitting Time (mins) (N=3816)</b>         |                                                           |                                                           |                                                           |
| Q1 (least deprived)<br>(reference)                 |                                                           |                                                           |                                                           |
| Q2                                                 | -4.82 (-14.19, 4.54)                                      | -6.92 (-16.48, 2.63)                                      | -7.03 (-16.56, 2.5)                                       |
| Q3                                                 | -0.65 (-10.03, 8.73)                                      | -3.28 (-12.75, 6.18)                                      | -3.67 (-13.1, 5.76)                                       |
| Q4                                                 | 7.84 (-1.65, 17.34)                                       | 4.99 (-4.9, 14.9)                                         | 4.5 (-5.33, 14.34)                                        |
| Q5 (most deprived)                                 | 4.34 (-4.98, 13.67)                                       | 1.69 (-8.08, 11.47)                                       | 2.14 (-7.66, 11.95)                                       |
| <i>Trend p</i>                                     | 0.048                                                     | 0.319                                                     | 0.294                                                     |
| <b>Weekend days</b>                                |                                                           |                                                           |                                                           |
| <i>Index of Multiple Deprivation Quintiles</i>     | Model 1 <sup>a</sup> Coefficient <sup>b</sup><br>(95% CI) | Model 2 <sup>a</sup> Coefficient <sup>b</sup><br>(95% CI) | Model 3 <sup>a</sup> Coefficient <sup>b</sup><br>(95% CI) |
| <b>Accelerometry Sedentary Time (mins) (N=455)</b> |                                                           |                                                           |                                                           |
| Q1 (least deprived)<br>(reference)                 |                                                           |                                                           |                                                           |
| Q2                                                 | -6.71 (-26.31, 12.89)                                     | -8.83 (-28.08, 10.4)                                      | 0.11 (-15.54, 15.77)                                      |
| Q3                                                 | -7.22 (-28.89, 14.45)                                     | -10.41 (-32.29, 11.45)                                    | -1.5 (-19.25, 16.24)                                      |
| Q4                                                 | 0.25 (-21.46, 21.98)                                      | -2.86 (-23.85, 18.12)                                     | 8.88 (-8.8, 26.57)                                        |
| Q5 (most deprived)                                 | -2.36 (-24.01, 19.27)                                     | -12.31 (-35.24, 10.61)                                    | -4.68 (-23.98, 14.62)                                     |
| <i>Trend p</i>                                     | 0.470                                                     | 0.495                                                     | 0.820                                                     |
| <b>TV Time (mins) (N=3874)</b>                     |                                                           |                                                           |                                                           |
| Q1 (least deprived)<br>(reference)                 |                                                           |                                                           |                                                           |
| Q2                                                 | 4.19 (-10.08, 18.48)                                      | 3.95 (-10.22, 18.14)                                      | 5.33 (-8.44, 19.11)                                       |
| Q3                                                 | -2.9 (-15.58, 9.77)                                       | 0.64 (-12.39, 13.69)                                      | 2.58 (-10.39, 15.55)                                      |
| Q4                                                 | -1.9 (-14.6, 10.8)                                        | 4.57 (-9.01, 18.16)                                       | 5.98 (-7.43, 19.4)                                        |
| Q5 (most deprived)                                 | 2.89 (-10.21, 16)                                         | 10.28 (-3.66, 24.22)                                      | 9.91 (-3.91, 23.74)                                       |
| <i>Trend p</i>                                     | 0.994                                                     | 0.175                                                     | 0.190                                                     |

**Non-TV Sitting Time (mins) (N=3841)**

|                                    |                      |                       |                       |
|------------------------------------|----------------------|-----------------------|-----------------------|
| Q1 (least deprived)<br>(reference) |                      |                       |                       |
| Q2                                 | -9.16 (-20.31, 1.98) | -11.14 (-22.28, 0)    | -10.51 (-21.68, 0.65) |
| Q3                                 | 2.43 (-9.51, 14.39)  | -1.17 (-13.02, 10.67) | -0.35 (-12.21, 11.5)  |
| Q4                                 | 14.67 (1.93, 27.4)   | 8.04 (-4.85, 20.94)   | 8.55 (-4.28, 21.38)   |
| Q5 (most deprived)                 | 12.56 (1.35, 23.76)  | 5.15 (-6.43, 16.73)   | 4.99 (-6.6, 16.59)    |
| <i>Trend p</i>                     | <i>0.000</i>         | <i>0.065</i>          | <i>0.071</i>          |

<sup>a</sup> Model 1: adjusted for age and sex; model 2: further adjustments for BMI, limiting longstanding illness, household income, and social class; model 3: further adjustments for time spent in active transportation to and from school (weekday models only), time spent in sporting or informal activities (on week or weekend days), and MVPA time (accelerometer models only, on week or weekend days). Models with accelerometry sedentary time as the outcome were also adjusted for average accelerometer wear time on valid days (week and weekend days).

<sup>b</sup> Generalised linear model coefficients; coefficients indicate mean differences (in daily sedentary time) between the reference category (quintile 1) and each of the other deprivation quintiles, e.g. a value of 5 indicates that a specific category had an average daily sedentary time that is 5 minutes higher than the referent group.
